# Supplementary material for: Effects of the Preschool-Based Family-Involving DAGIS Intervention Program on Children’s Energy Balance-Related Behaviors and Self-Regulation Skills: A Clustered Randomized Controlled Trial
Source: PubMed Central journal article supplement (PMC7551940; doi:10.3390/nu12092599), 2020-08-26
Supplement: nutrients-12-02599-s001.pdf [file nutrients-12-02599-s001.pdf]

Supplementary Table S1. Number of children and missing values in each outcome.

| Dependent variable (outcome)                     | Number of children included in mixed models with information at baseline or follow-up, or both | Number of child participants at baseline | Number of child participants at follow-up | Children with missing values for PEL* | Children with missing values for age |
|--------------------------------------------------|------------------------------------------------------------------------------------------------|------------------------------------------|-------------------------------------------|---------------------------------------|--------------------------------------|
| Total screen total (min/day)                     | 737                                                                                            | 673                                      | 586                                       | 50                                    | 1                                    |
| Total physical activity (min/day)                | 680                                                                                            | 605                                      | 492                                       | 40                                    | 1                                    |
| Sugary everyday foods and beverages (times/week) | 645                                                                                            | 600                                      | 441                                       | 28                                    | 0                                    |
| Sugary treats (times/week)                       | 654                                                                                            | 617                                      | 428                                       | 28                                    | 0                                    |
| Fruits and vegetables (times/week)               | 652                                                                                            | 612                                      | 452                                       | 29                                    | 0                                    |
| Cognitive self-regulation skills (scale 1-3)     | 722                                                                                            | 697                                      | 580                                       | 18                                    | 1                                    |
| Emotional self-regulation skills (scale 1-3)     | 722                                                                                            | 697                                      | 580                                       | 18                                    | 1                                    |

\*PEL parental educational level

Supplementary Table S2. Descriptors for study outcomes by control and intervention groups and by parental educational level (PEL).

|                                                  | PEL    | Baseline |                |              |                | Follow-up |                |              |                |
|--------------------------------------------------|--------|----------|----------------|--------------|----------------|-----------|----------------|--------------|----------------|
|                                                  |        | control  |                | intervention |                | control   |                | intervention |                |
|                                                  |        | n        | mean ± SD      | n            | mean ± SD      | n         | mean ± SD      | n            | mean ± SD      |
| Total screen total (min/day)                     | low    | 104      | 94.17 ± 48.01  | 94           | 97.82 ± 43.48  | 81        | 93.95 ± 41.70  | 77           | 98.88 ± 47.94  |
|                                                  | middle | 147      | 82.57 ± 41.20  | 125          | 83.12 ± 38.56  | 141       | 88.42 ± 38.11  | 113          | 79.56 ± 35.25  |
|                                                  | high   | 94       | 76.37 ± 39.17  | 54           | 77.52 ± 41.48  | 80        | 83.61 ± 45.75  | 49           | 79.80 ± 33.87  |
| Total physical activity (min/day)                | low    | 90       | 412.95 ± 49.96 | 87           | 402.09 ± 50.76 | 62        | 409.64 ± 48.70 | 61           | 402.96 ± 53.42 |
|                                                  | middle | 139      | 409.95 ± 50.77 | 116          | 409.18 ± 46.54 | 124       | 419.91 ± 41.72 | 93           | 419.00 ± 49.90 |
|                                                  | high   | 84       | 416.32 ± 44.41 | 50           | 402.06 ± 44.11 | 71        | 418.49 ± 48.34 | 40           | 420.91 ± 50.12 |
| Sugary everyday foods and beverages (times/week) | low    | 78       | 9.97 ± 8.77    | 88           | 10.02 ± 7.15   | 56        | 10.75 ± 13.01  | 57           | 10.95 ± 7.24   |
|                                                  | middle | 134      | 9.75 ± 5.97    | 128          | 10.27 ± 7.08   | 108       | 10.44 ± 8.44   | 96           | 9.46 ± 7.31    |
|                                                  | high   | 80       | 8.93 ± 6.19    | 53           | 10.42 ± 6.04   | 70        | 9.37 ± 5.36    | 38           | 8.84 ± 5.00    |
| Sugary treats (times/week)                       | low    | 77       | 5.77 ± 4.56    | 92           | 4.78 ± 3.37    | 53        | 8.11 ± 7.62    | 58           | 7.09 ± 7.99    |
|                                                  | middle | 141      | 5.63 ± 3.62    | 130          | 6.35 ± 3.02    | 108       | 6.56 ± 4.58    | 86           | 7.14 ± 3.57    |
|                                                  | high   | 85       | 6.34 ± 3.82    | 53           | 6.08 ± 2.90    | 67        | 7.03 ± 4.37    | 39           | 7.21 ± 3.63    |
| Total fruit and vegetables (times/week)          | low    | 80       | 19.85 ± 10.30  | 91           | 21.62 ± 13.00  | 57        | 20.18 ± 10.23  | 61           | 23.13 ± 12.46  |
|                                                  | middle | 141      | 21.10 ± 10.05  | 129          | 21.88 ± 13.05  | 116       | 22.34 ± 12.20  | 90           | 23.32 ± 14.63  |
|                                                  | high   | 87       | 24.68 ± 11.62  | 54           | 25.06 ± 14.26  | 75        | 23.73 ± 11.12  | 41           | 25.05 ± 12.48  |
| Cognitive self-regulation skills (1-3)           | low    | 113      | 2.36 ± 0.36    | 108          | 2.25 ± 0.43    | 81        | 2.29 ± 0.40    | 82           | 2.37 ± 0.44    |
|                                                  | middle | 164      | 2.26 ± 0.41    | 143          | 2.24 ± 0.41    | 146       | 2.33 ± 0.41    | 116          | 2.34 ± 0.43    |
|                                                  | high   | 100      | 2.33 ± 0.37    | 56           | 2.39 ± 0.45    | 83        | 2.32 ± 0.41    | 49           | 2.32 ± 0.42    |
| Emotional self-regulation skills (1-3)           | low    | 113      | 2.25 ± 0.51    | 108          | 2.23 ± 0.52    | 81        | 2.22 ± 0.46    | 82           | 2.27 ± 0.53    |
|                                                  | middle | 164      | 2.40 ± 0.52    | 143          | 2.52 ± 0.52    | 146       | 2.20 ± 0.55    | 116          | 2.28 ± 0.52    |
|                                                  | high   | 100      | 2.31 ± 0.48    | 56           | 2.33 ± 0.50    | 83        | 2.36 ± 0.47    | 49           | 2.38 ± 0.54    |

Supplementary Table S3. Adjusted differences and their 95% confidence interval (C.I.) between intervention and control group separated for baseline and follow-up; and adjusted differences between follow-up and baseline for each study group

| Outcomes                                             | baseline |                 |         | follow-up |                 |         | Control  |                 |                  | Intervention |                 |                  | p-value interaction | Effect size for interaction |
|------------------------------------------------------|----------|-----------------|---------|-----------|-----------------|---------|----------|-----------------|------------------|--------------|-----------------|------------------|---------------------|-----------------------------|
|                                                      | diff I-C | (95% C.I.)      | p-value | diff I-C  | (95% C.I.)      | p-value | diff F-B | (95% C.I.)      | p-value          | diff F-B     | (95% C.I.)      | p-value          |                     |                             |
| Total screen time (min/day) <sup>a</sup>             | 3.22     | (-4.67 ; 11.12) | 0.411   | -2.66     | (-10.75 ; 5.43) | 0.508   | 4.46     | (0.48 ; 8.44)   | <b>0.028</b>     | -1.42        | (-5.86 ; 3.01)  | 0.529            | 0.053               | 0.01                        |
| Total physical activity (min/day) <sup>b</sup>       | -6.45    | (-14.83 ; 1.92) | 0.126   | -2.93     | (-11.74 ; 5.88) | 0.504   | 23.77    | (18.57 ; 28.97) | <b>&lt;0.001</b> | 27.30        | (21.74 ; 32.86) | <b>&lt;0.001</b> | 0.307               | 0.001                       |
| Sugary foods and beverages (times/week) <sup>a</sup> | 0.82     | (-0.75 ; 2.40)  | 0.293   | -0.47     | (-2.15 ; 1.21)  | 0.574   | 0.51     | (-0.42 ; 1.43)  | 0.285            | -0.79        | (-1.77 ; 0.19)  | 0.112            | 0.435               | 0.001                       |
| Sugary treats (times/week) <sup>a</sup>              | -0.05    | (-0.96 ; 0.86)  | 0.910   | 0.04      | (-0.96 ; 1.03)  | 0.941   | 1.20     | (0.62 ; 1.77)   | <b>&lt;0.001</b> | 1.28         | (0.67 ; 1.90)   | <b>&lt;0.001</b> | 0.837               | 0.001                       |
| Fruit and vegetables (times/week) <sup>a</sup>       | -0.52    | (-2.89 ; 1.84)  | 0.654   | 1.06      | (-1.45 ; 3.56)  | 0.398   | -0.37    | (-1.63 ; 0.89)  | 0.565            | 1.21         | (-0.18 ; 2.61)  | 0.088            | 0.088               | 0.01                        |
| Cognitive SR skills (scale 1-3) <sup>a</sup>         | -0.04    | (-0.11 ; 0.02)  | 0.202   | 0.01      | (-0.07 ; 0.08)  | 0.888   | 0.01     | (-0.03 ; 0.05)  | 0.574            | 0.06         | (0.01 ; 0.11)   | <b>0.011</b>     | 0.123               | 0.001                       |
| Emotional SR skills (scale 1-3) <sup>a</sup>         | 0.01     | (-0.07 ; 0.08)  | 0.882   | -0.03     | (-0.11 ; 0.06)  | 0.530   | 0.004    | (-0.05 ; 0.04)  | 0.885            | -0.04        | (-0.09 ; 0.02)  | 0.195            | 0.384               | 0.002                       |

<sup>a</sup> models adjusted for adjusted for gender, age in years, municipality and parental educational level

<sup>b</sup> models adjusted for adjusted for gender, age in years, municipality and parental educational level and accelerometer wear time

diff: estimated adjusted difference

FV: fruit and vegetable
